# Supplementary material for: Economic losses or environmental gains? Framing effects on public support for environmental management
Source: PLOS journal article supplement (doi:10.1371/journal.pone.0220320), 2019-07-25
Supplement: S1 (10.1371/journal.pone.0220320.s001) [file journal.pone.0220320.s001]

S1 Fig. Sample Demographics

| Statistic                  | Sample Statistics | CA Pop. Statistics |
|----------------------------|-------------------|--------------------|
| Age                        |                   |                    |
| 18-25 yrs                  | 16.5%             | 14.2%              |
| 26-35 yrs                  | 23.8%             | 19.3%              |
| 36-50 yrs                  | 22.0%             | 28.7%              |
| 51-65 yrs                  | 25.1%             | 23.2%              |
| >65 yrs                    | 16.1%             | 14.6%              |
| Gender                     |                   |                    |
| Male                       | 36.2%             | 49.7%              |
| Female                     | 63.8%             | 50.3%              |
| Household Income           |                   |                    |
| <\$40,000                  | 35.7%             | 33.7%              |
| \$40,000-75,000            | 25.1%             | 20.8%              |
| \$75,000-150,000           | 24.9%             | 27.3%              |
| >\$150,000                 | 14.4%             | 14.0%              |
| Education                  |                   |                    |
| HS Grad or Less            | 13.8%             | 38.6%              |
| Some College               | 40.6%             | 29.1%              |
| Bachelor's Degree          | 30.6%             | 20.3%              |
| Advanced Degree            | 15.1%             | 12%                |
| Total Bachelor's or Higher | 45.7%             | 32.3%              |
| Race                       |                   |                    |
| Non-Hispanic White         | 56.2%             | 37.8%              |
| Hispanic                   | 20.1%             | 38.8%              |
| Asian                      | 17.3%             | 14%                |
| Black                      | 5.9%              | 5.6%               |
| American Indian            | 3.7%              | <1%                |
| Household Location         |                   |                    |
| Rural                      | 24.1%             | 13%                |
| Urban/Suburban             | 75.9%             | 87%                |
| Party ID                   |                   |                    |
| Democrat                   | 47.8%             | 44.8%              |
| Republican                 | 28%               | 27.3%              |
| Independent                | 24.1%             | 23.3%              |

Data comes from 2010 and 2015 American Community Survey estimates, and from the Public Policy Institute of California Statewide Survey. CA population data for age are estimates, as age bins do not align between the ACS and our survey.
